# Supplementary material for: Functions of resolvin D1-ALX/FPR2 receptor interaction in the hemoglobin-induced microglial inflammatory response and neuronal injury
Source: PubMed Central journal article supplement (PMC7429751; doi:10.1186/s12974-020-01918-x), 2020-08-14

Figure S1 Chemical structure of RvD1.

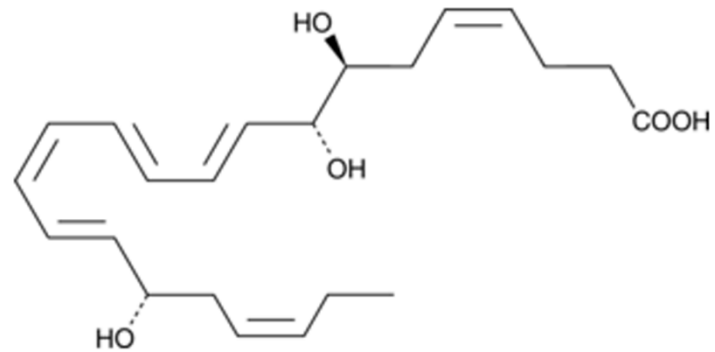

Figure S2 Dose response experiments of RvD1 in microglia and neurons.

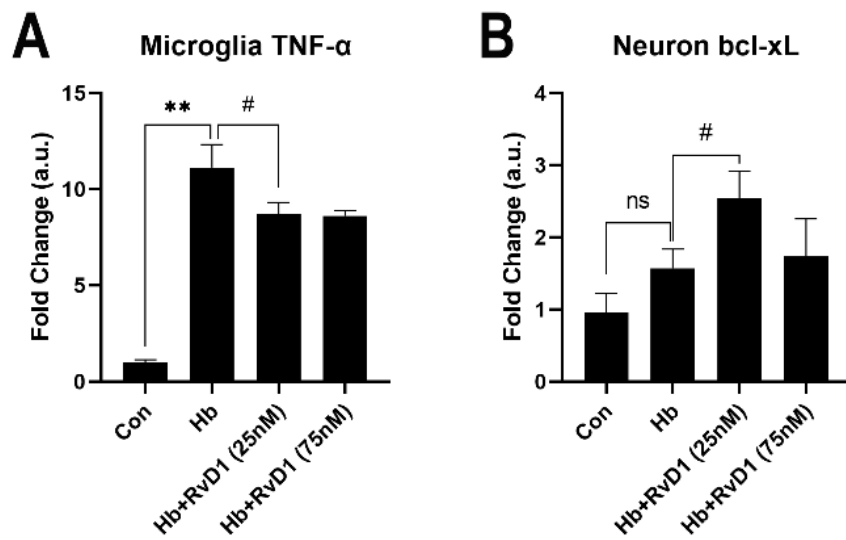

Supplement: 12974_2020_1918_MOESM1_ESM.pdf [file 12974_2020_1918_MOESM1_ESM.pdf]
